# Supplementary material for: Microbial synergy between Rhodospirillum rubrum and Acetobacterium woodii enables anaerobic CO conversion to polyhydroxyalkanoates
Source: Royal Society of Chemistry journal article supplement (doi:10.1039/d5gc01092f), 2025-01-01
Supplement: d5gc01092f1.pdf [file d5gc01092f1.pdf]

## Supplementary figures

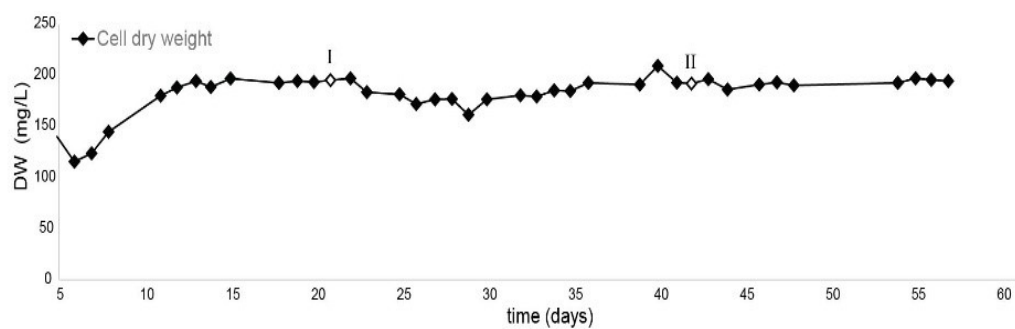

**Figure S1.** Biomass concentration during chemostat cultivation of a mono-culture of *R. rubrum*. I: Decreasing the sodium ion concentration of inflow from 5 to 2.5 mM, II Decreasing the sodium ion concentration of the inflow from 2.5 to 0 mM.

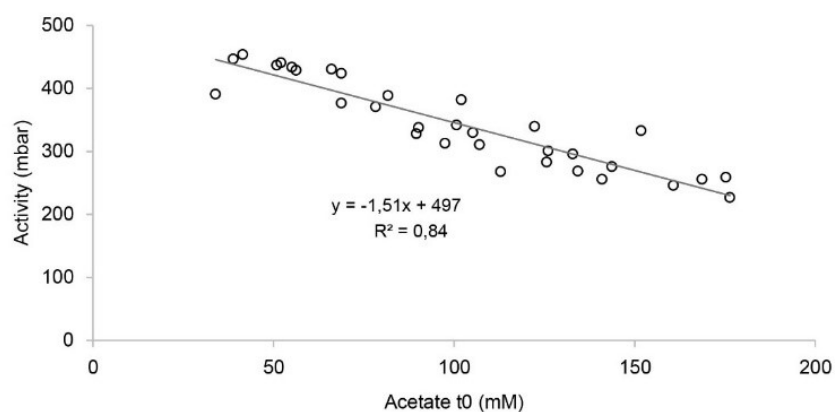

**Figure S2.** Activity of *R. rubrum* under a gradient of potassium acetate concentrations. Activity was measured by the pressure increase due to WGS activity at day 6 after inoculation.

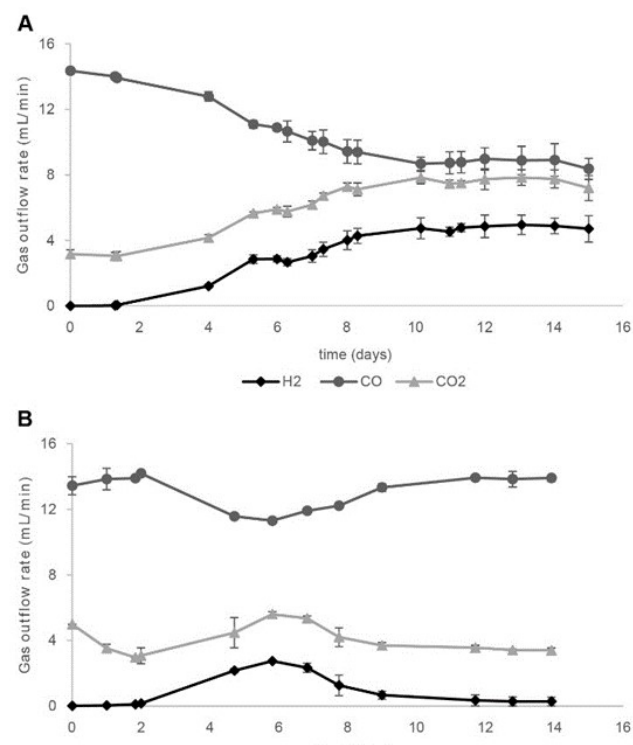

**Figure S3.** Gas outflow composition of fed-batch bioreactors operated with a co-culture of *R. rubrum* and *A. woodii* (A) or a mono-culture of *R. rubrum* (B).
